# Supplementary material
Source: MDPI journal article supplement (https://www.mdpi.com/2073-8994/14/11/2448)
Supplement: s1 [file s1]

**Table S1.** Peak positions and FWHM values of XPS spectra.

| Thickness        | P 2p      |          | Mo 3d <sub>5/2</sub><br>(Mo <sup>6+</sup> ) |      | Mo 3d <sub>5/2</sub><br>(Mo <sup>5+</sup> ) |      | Mo 3d <sub>5/2</sub><br>(Mo <sup>4+</sup> ) |      | O 1s (MoO <sub>3</sub> ) |      | O 1s (CoO <sub>x</sub> ) |      | Co 2p <sub>3/2</sub> (CoO <sub>x</sub> ) |      | Co 2p <sub>3/2</sub> (metallic) |      |
|------------------|-----------|----------|---------------------------------------------|------|---------------------------------------------|------|---------------------------------------------|------|--------------------------|------|--------------------------|------|------------------------------------------|------|---------------------------------|------|
|                  | Positions | FWHM     | Positions                                   | FWHM | Positions                                   | FWHM | Positions                                   | FWHM | Positions                | FWHM | Positions                | FWHM | Positions                                | FWHM | Positions                       | FWHM |
| BP               | 130.3770  | 0.887468 |                                             |      |                                             |      |                                             |      |                          |      |                          |      |                                          |      |                                 |      |
| MoO <sub>3</sub> |           |          | 232.71                                      | 1.06 |                                             |      |                                             |      | 530.50                   | 1.25 |                          |      |                                          |      |                                 |      |
| 1 Å              |           |          | 232.64                                      | 1.60 |                                             |      |                                             |      | 530.75                   | 1.31 | 531.77                   | 1.63 | 781.41                                   | 2.47 |                                 |      |
| 2 Å              |           |          | 232.57                                      | 1.92 |                                             |      |                                             |      | 530.80                   | 1.33 | 531.41                   | 2.06 | 781.35                                   | 2.74 |                                 |      |
| 4 Å              |           |          | 232.50                                      | 1.96 | 230.73                                      | 1.96 |                                             |      | 530.77                   | 1.33 | 531.53                   | 2.21 | 781.25                                   | 3.35 |                                 |      |
| 8 Å              |           |          | 232.54                                      | 2.04 | 230.60                                      | 2.04 |                                             |      | 530.69                   | 1.32 | 531.36                   | 2.20 | 780.82                                   | 3.85 | 778.65                          | 1.31 |
| 15 Å             |           |          | 232.60                                      | 2.06 | 230.60                                      | 2.06 | 229.62                                      | 2.06 | 530.59                   | 1.38 | 531.39                   | 2.39 |                                          |      | 778.55                          | 1.45 |
| 30 Å             |           |          | 232.60                                      | 1.97 | 230.70                                      | 1.97 | 229.60                                      | 1.97 | 530.49                   | 1.40 | 531.15                   | 2.33 |                                          |      | 778.48                          | 1.43 |
| 60 Å             |           |          | 232.60                                      | 2.03 | 230.70                                      | 2.03 | 229.59                                      | 2.03 | 530.42                   | 1.53 | 531.44                   | 2.85 |                                          |      | 778.43                          | 1.35 |
